# Supplementary material for: Dose-dependent effects of GAT107, a novel allosteric agonist-positive allosteric modulator (ago-PAM) for the α7 nicotinic cholinergic receptor: a BOLD phMRI and connectivity study on awake rats
Source: Front Neurosci. 2023 Jun 23;17:1196786. doi: 10.3389/fnins.2023.1196786 (PMC10326388; doi:10.3389/fnins.2023.1196786)
Supplement: Supplementary file 1 [file Table_1.XLSX]

## Sheet: Sheet1
	Postive BOLD Volume of Activation							Negative BOLD Volume of Activation
		Veh	1.0 mg	3.0 mg	10.0 mg				Veh	1.0 mg	3.0 mg	10.0 mg
	Brain Area	Med	Med	Med	Med	P val		Brain Area	Med	Med	Med	Med	P val
	primary somatosensory ctx trunk	0	0	17	0	0.008		locus ceruleus	1	0	1	0	0.011
	precuniform nucleus	0	0	1	0	0.013		ventral orbital ctx	15.5	11	0.5	29	0.012
	1st cerebellar lobule	0	5	0	8	0.014		insular ctx	237	119	80.5	288	0.012
	motor trigeminal nucleus	2	0	4	2	0.016		perirhinal ctx	66.5	30	34.5	77	0.014
	primary somatosensory ctx jaw	21.5	33	159.5	2	0.017		ectorhinal ctx	15.5	14	27.5	18	0.018
	supraoptic nucleus	0.5	0	0	1	0.019		lateral orbital ctx	52	45	13.5	64	0.019
	ventral posteriolateral thalamus	3	0	26.5	5	0.021		pineal gland	3	0	2.5	2	0.021
	primary motor ctx	34	32	275	15	0.022		primary motor ctx	49.5	64	16	167	0.021
	raphe linear	0	0	4.5	0	0.026		frontal association ctx	13	15	3.5	21	0.036
	primary somatosensory ctx shoulder	0	3	14	0	0.026		secondary motor ctx	25.5	23	15.5	109	0.036
	root of trigeminal nerve	32.5	13	35	57	0.027		primary somatosensory ctx shoulder	4	10	0	10	0.041
	premammillary nucleus	0	0	4	3	0.028		ventral anterior thalamus	1.5	0	0	7	0.045
	median raphe nucleus	0	0	11	0	0.03		red nucleus	4	1	0	7	0.048
	infralimbic ctx	17	6	33.5	24	0.03		anterior olfactory nucleus	96	62	26	76	0.049
	endopiriform nucleus	2	3	26	0	0.031		endopiriform nucleus	29	15	8.5	36	0.053
	accumbens core	1	0	24.5	0	0.032		primary somatosensory ctx trunk	1.5	3	0	11	0.054
	paraflocculus cerebellum	84	28	53.5	121	0.033		primary somatosensory ctx jaw	70	39	6.5	113	0.056
	pineal gland	0	3	0	0	0.035		external plexiform layer	56.5	34	23	51	0.058
	white matter	110	98	261	163	0.035		rostral piriform ctx	104.5	46	12.5	109	0.059
	insular ctx	42	42	203	26	0.035		lateral amygdaloid nucleus	4.5	0	5.5	11	0.06
	ventrolateral thalamus	0	1	14.5	0	0.037		reticular nucleus	11.5	7	0	13	0.062
	parvicellular reticular nucleus	36	17	29	68	0.039		retrosplenial caudal ctx	105	32	120.5	119	0.065
	primary somatosensory ctx hindlimb	0.5	8	66.5	0	0.04		primary somatosensory ctx hindlimb	17.5	27	7	45	0.066
	claustrum	0	0	7	0	0.043		primary somatosensory ctx forelimb	27	16	3	74	0.066
	parafascicular thalamus	4	0	41.5	5	0.045		granular cell layer	107.5	111	26	93	0.066
	secondary motor ctx	15	27	117.5	10	0.047		CA1 hippocampus ventral	18.5	11	13	43	0.07
	anterior thalamus	3	0	36	3	0.047		primary somatosensory ctx upper lip	39	13	9	87	0.072
	reticular nucleus midbrain	27.5	30	81.5	40	0.051		dorsal medial striatum	46.5	30	1.5	103	0.072
	pontine reticular nucleus oral	3	1	44	4	0.052		ventrolateral thalamic nucleus	3.5	3	0	11	0.075
	CA3 dorsal	13	16	58	31	0.052		parafascicular thalamic nucleus	5	11	0	37	0.078
	pontine reticular nucleus caudal	6.5	1	19.5	3	0.054		prerubral field	2	0	1	5	0.082
	parietal ctx	3	0	32.5	3	0.057		precuniform nucleus	0	0	0.5	0	0.084
	prelimbic ctx	14	2	58.5	11	0.058		lemniscal nucleus	0	8	10.5	9	0.085
	ventral anterior thalamic nucleus	0	0	9.5	0	0.059		CA2	1.5	2	0.5	4	0.091
	ventral orbital ctx	1.5	1	36	3	0.06		2nd cerebellar lobule	8.5	66	54	37	0.093
	ectorhinal ctx	7	6	0	1	0.061		primary somatosensory ctx barrel field	20.5	64	15.5	145	0.095
	paramedian lobule	24.5	4	13.5	50	0.064		secondary somaotsensory ctx	39	18	14	63	0.097
	rostral piriform ctx	30.5	11	145.5	49	0.065		dorsal lateral striatum	49.5	17	10	103	0.116
	ventral lateral striatum	1.5	34	58.5	0	0.065		ventral tegmental area	2.5	0	4	5	0.128
	CA2	0	0	1	0	0.066		visual 2 ctx	24	76	91	121	0.129
	substantia nigra reticularis	21.5	7	14.5	34	0.07		prelimbic ctx	1	9	7	47	0.131
	dorsal medial striatum	3.5	5	123	11	0.072		ventral posteriolateral thalamic nucleus	7	1	0	14	0.152
	primary somatosensory ctx barrel field	27	23	156	20	0.075		substantia nigra compacta	0.5	0	4	4	0.163
	accumbens shell	14.5	0	32.5	21	0.075		neural lobe pituitary	0.5	0	2.5	0	0.163
	ventral medial striatum	0	10	56	8	0.078		3rd cerebellar lobule	11	35	32.5	16	0.166
	flocculus cerebellum	2.5	1	10.5	16	0.08		anterior thalamic nuclei	5.5	2	0	27	0.167
	lateral orbital ctx	11	18	58.5	5	0.082		pedunculopontine tegmental area	0	0	1	3	0.17
	7th cerebellar lobule	0	15	0	0	0.086		4th cerebellar lobule	8.5	62	32	27	0.172
	reticular nucleus	3	3	20	8	0.087		arcuate nucleus	1.5	2	0	0	0.173
	primary somatosensory ctx forelimb	6.5	6	123	3	0.087		reticulotegmental nucleus	0	0	0	2	0.173
	posterior thalamic nucleus	7.5	3	45.5	4	0.087		visual 1 ctx	43.5	49	81.5	129	0.178
	primary somatosensory ctx upper lip	21.5	25	122.5	12	0.089		9th cerebellar lobule	15.5	35	53	21	0.179
	retrosplenial rostral ctx	8	11	55	15	0.089		motor trigeminal nucleus	0.5	4	2	7	0.182
	neural lobe pituitary	2.5	2	5	8	0.093		reticular nucleus midbrain	56.5	24	55	91	0.191
	external plexiform layer	33.5	29	52.5	25	0.094		posterior hypothalamic area	9.5	1	12	8	0.197
	interposed nucleus	0	0	0.5	6	0.094		medial mammillary nucleus	2.5	0	3.5	0	0.2
	principal sensory nucleus trigeminal	22.5	11	32	61	0.096		PCRt	34	81	67	33	0.203
	reticulotegmental nucleus	0	0	2	0	0.096		premammillary nucleus	1	0	0	0	0.219
	raphe magnus	0	0	1.5	0	0.096		retrochiasmatic nucleus	0.5	0	0	0	0.22
	anterior cingulate area	18.5	31	116	31	0.097		basal amygdaloid nucleus	23.5	19	19.5	37	0.221
	anterior amygdaloid nucleus	0	0	0	0	0.099		7th cerebellar lobule	2	8	13	16	0.223
	cortical amygdaloid nucleus	32	19	37	18	0.102		temporal ctx	44	24	34	45	0.228
	dorsal lateral striatum	5	17	123.5	5	0.106		posterior thalamic nucleus	12.5	6	4.5	37	0.231
	inferior olivary complex	3.5	0	5.5	12	0.107		dentate gyrus ventral	2.5	11	15.5	18	0.231
	ventromedial thalamic nucleus	0.5	0	15	1	0.108		copula of the pyramis	10.5	23	43	16	0.231
	retrochiasmatic nucleus	0	0	1	0	0.109		cochlear nucleus	7.5	16	8	3	0.232
	lateral septal nucleus	21.5	29	89	47	0.111		raphe obscurus nucleus	0	0	1.5	0	0.248
	copula of the pyramis	22	8	7	44	0.117		dentate gyrus dorsal	14.5	15	27.5	26	0.248
	medial dorsal thalamic nucleus	4	1	11	7	0.122		root of trigeminal nerve	27	32	43	25	0.249
	lateral amygdaloid nucleus	3	3	4	0	0.126		auditory ctx	137.5	100	77	159	0.257
	central medial thalamic nucleus	0	0	5	0	0.132		ventral medial striatum	15.5	13	8.5	45	0.257
	facial nucleus	8.5	5	12	24	0.133		anterior cingulate area	23.5	22	25.5	84	0.259
	lateral posterior thalamic nucleus	19	11	35.5	22	0.135		1st cerebellar lobule	6.5	1	5	1	0.269
	tenia tecta ctx	18	4	30.5	38	0.136		superior colliculus	63.5	36	45	63	0.269
	red nucleus	0	0	1	0	0.141		parabrachial nucleus	7	2	11	4	0.281
	auditory ctx	32	5	83.5	19	0.143		diagonal band of Broca	0.5	2	0	0	0.29
	Lat	0.5	0	0	2	0.158		periolivary nucleus	3	2	6	2	0.297
	ventral posteriolmedial thalamic nucleus	1.5	1	20.5	4	0.159		cortical amygdaloid nucleus	6	11	7.5	17	0.301
	ventral subiculum	33	9	25.5	15	0.165		flocculus cerebellum	9.5	7	6	4	0.303
	subthalamic nucleus	0	0	0	0	0.165		claustrum	3	1	1.5	9	0.304
	lateral dorsal thalamic nucleus	0.5	0	4.5	3	0.165		infralimbic ctx	7.5	4	0.5	15	0.304
	granular cell layer	72	51	129.5	59	0.166		paramedian lobule	19.5	56	78.5	36	0.312
	gigantocellular reticular nucleus pons	36	10	27.5	71	0.174		subiculum dorsal	11.5	11	18	20	0.315
	CA1 hippocampus ventral	19	5	24	11	0.177		anterior pretectal nucleus	4	1	0	12	0.317
	pedunculopontine tegmental area	0	0	1	0	0.184		ventral subiculum	24	15	26.5	34	0.319
	cochlear nucleus	10	2	8.5	26	0.199		glomerular layer	75	78	40.5	86	0.32
	prerubral field	0.5	0	2	0	0.202		globus pallidus	5	0	4.5	10	0.324
	caudal piriform ctx	87.5	108	114.5	53	0.214		paraflocculus cerebellum	66.5	74	121	48	0.325
	perirhinal ctx	16.5	15	48.5	18	0.222		tenia tecta ctx	14	18	6	8	0.33
	medial preoptic area	6.5	6	13	17	0.222		ventral posteriolmedial thalamic nucleus	6.5	1	1	16	0.333
	CA1 dorsal	26.5	47	42.5	19	0.228		Lat	0.5	2	4	0	0.342
	locus ceruleus	0	0	0	0	0.23		raphe linear	4.5	0	0	7	0.36
	diagonal band of Broca	6	2	6.5	9	0.243		sub coeruleus nucleus	2.5	7	5.5	17	0.389
	secondary somaotsensory ctx	22	11	62.5	8	0.244		inferior colliculus	62.5	64	83.5	88	0.391
	supramammillary nucleus	2	2	4	6	0.245		ventral lateral striatum	76.5	31	59.5	186	0.392
	frontal association ctx	10.5	12	24	7	0.252		accumbens shell	17	14	11.5	38	0.405
	reuniens nucleus	0	3	10.5	9	0.256		interpeduncular nucleus	0	0	3	1	0.407
	anterior olfactory nucleus	17	17	62.5	25	0.262		dorsal raphe	0	0	0	1	0.409
	9th cerebellar lobule	12	0	0	23	0.266		CA3 dorsal	31	34	7.5	23	0.411
	central gray	9	2	12.5	17	0.27		substantia nigra reticularis	4.5	8	12	6	0.418
	trapezoid body	0.5	2	0.5	3	0.28		gigantocellular reticular nucleus pons	59.5	100	103.5	74	0.418
	raphe obscurus nucleus	0	0	0	0	0.29		pontine reticular nucleus caudal	11.5	62	22.5	71	0.421
	medial cerebellar nucleus fastigial	0	1	0	4	0.292		medial cerebellar nucleus fastigial	4.5	1	5.5	0	0.422
	medial orbital ctx	9.5	0	4	6	0.292		accumbens core	7	6	5	54	0.423
	glomerular layer	66.5	43	113	57	0.294		parietal ctx	5.5	10	3.5	48	0.431
	crus 1 of ansiform lobule	62.5	34	38	129	0.297		facial nucleus	0.5	5	16.5	2	0.433
	paraventricular nucleus	3.5	1	8.5	8	0.298		caudal piriform ctx	74.5	65	64.5	80	0.443
	2nd cerebellar lobule	13.5	15	8	35	0.31		reuniens nucleus	1	0	3.5	6	0.45
	lateral preoptic area	3.5	5	10.5	7	0.324		interposed nucleus	6.5	5	11.5	0	0.451
	ventral pallidum	16	3	29	20	0.327		CA1 dorsal	36	25	50	80	0.452
	anterior hypothalamic area	9.5	3	10	15	0.333		anterior amygdaloid nucleus	0	0	0	0	0.454
	lemniscal nucleus	19.5	8	13	15	0.334		extended amydala	5	1	2.5	6	0.455
	White Matter	23.5	31	43.5	36	0.338		lateral posterior thalamic nucleus	3.5	8	3	25	0.456
	parabrachial nucleus	6.5	6	7	17	0.349		ventromedial thalamic nucleus	20	0	3	14	0.486
	crus 2 of ansiform lobule	13	19	36	43	0.35		supraoptic nucleus	0	0	0	0	0.488
	anterior pretectal nucleus	0.5	1	12	1	0.352		dorsomedial tegmental area	1	2	0.5	8	0.493
	basal amygdaloid nucleus	21	25	41	25	0.354		retrosplenial rostral ctx	9.5	17	10.5	29	0.497
	10th cerebellar lobule	6	8	2.5	19	0.367		central gray	4.5	0	6	2	0.498
	bed nucleus stria terminalis	0.5	2	12	2	0.367		lateral dorsal thalamic nucleus	1.5	0	0	1	0.505
	6th cerebellar lobule	5.5	45	20	42	0.371		trapezoid body	1	5	3.5	9	0.525
	superior colliculus	45.5	41	77	54	0.381		DPGi	2	13	3.5	3	0.53
	habenula nucleus	9.5	7	12	14	0.402		medial dorsal thalamic nucleus	1	1	0	7	0.55
	paraventricular nuclus	0	2	2	4	0.402		median raphe nucleus	3.5	2	0	0	0.571
	anterior lobe pituitary	33	19	23.5	48	0.403		bed nucleus stria terminalis	3	1	6.5	19	0.587
	pontine nuclei	19.5	21	12	24	0.408		anterior hypothalamic area	6.5	3	12.5	8	0.593
	central amygdaloid nucleus	3	8	2.5	2	0.41		lateral hypothalamus	32	19	69.5	64	0.594
	periolivary nucleus	8.5	10	8.5	20	0.417		lateral preoptic area	1	0	3	7	0.6
	8th cerebellar lobule	11	0	0	27	0.428		10th cerebellar lobule	10.5	7	25	10	0.615
	medial geniculate	18.5	19	9.5	17	0.451		subthalamic nucleus	0	0	0	0	0.617
	DPGi	0	1	2.5	4	0.454		habenula nucleus	1	5	1.5	9	0.632
	olfactory tubercles	43	23	66	84	0.478		medial orbital ctx	0.5	6	3	3	0.639
	zona incerta	11.5	8	17.5	16	0.488		substantia innominata	0.5	0	0	0	0.641
	medial septum	0.5	0	2.5	2	0.489		zona incerta	21.5	5	10	21	0.643
	dorsomedial tegmental area	0	4	5.5	3	0.518		medial septum	0.5	0	0	0	0.646
	interpeduncular nucleus	4.5	1	6.5	5	0.526		central medial thalamic nucleus	0	0	0	0	0.651
	dorsal raphe	2	0	0	0	0.529		principal sensory nucleus trigeminal	29.5	37	42	22	0.651
	lateral geniculate	9	16	15	21	0.552		5th cerebellar lobule	43	61	68.5	28	0.653
	simple lobule cerebellum	10	41	9.5	9	0.576		White Matter	262.5	222	218.5	372	0.655
	arcuate nucleus	0	0	4.5	4	0.581		White Matter	19	38	16	31	0.656
	CA3 hippocampus ventral	9	8	16	14	0.591		8th cerebellar lobule	27	44	39	35	0.657
	solitary tract nucleus	12.5	2	4.5	20	0.594		supramammillary nucleus	0	0	3	0	0.661
	triangular septal nucleus	1	0	2	2	0.613		lateral septal nucleus	23.5	26	3.5	17	0.686
	visual 2 ctx	27.5	24	33.5	15	0.62		paraventricular nuclus	0	0	0.5	0	0.699
	medial mammillary nucleus	5	6	7	9	0.63		crus 2 of ansiform lobule	14	44	30	42	0.712
	3rd cerebellar lobule	2	4	14.5	15	0.647		crus 1 of ansiform lobule	91	108	98	51	0.716
	5th cerebellar lobule	9.5	37	25	32	0.676		6th cerebellar lobule	50.5	42	95	60	0.719
	vestibular nucleus	6.5	27	25.5	32	0.729		central amygdaloid nucleus	10.5	5	10.5	14	0.729
	4th cerebellar lobule	2	3	6.5	3	0.74		medial geniculate	2.5	9	15	9	0.734
	retrosplenial caudal ctx	67	113	45	43	0.759		periaqueductal gray thalamus	39.5	17	30.5	40	0.743
	medial amygdaloid nucleus	11.5	11	17.5	20	0.76		olfactory tubercles	24	28	17.5	11	0.75
	sub coeruleus nucleus	3	2	2	4	0.768		intercalated amygdaloid nucleus	0	0	0	0	0.754
	posterior hypothalamic area	4.5	1	10	9	0.779		entorhinal ctx	101.5	87	136.5	122	0.76
	intercalated amygdaloid nucleus	0	0	0	0	0.78		pontine reticular nucleus oral	4	1	2	15	0.761
	periaqueductal gray thalamus	38.5	30	64.5	38	0.784		pontine nuclei	13	9	23	23	0.77
	ventral tegmental area	2	3	7	1	0.795		inferior olivary complex	6	6	8.5	4	0.777
	entorhinal ctx	129.5	104	149.5	139	0.822		lateral geniculate	5	5	3	8	0.787
	globus pallidus	0	5	2	1	0.845		ventral medial nucleus	4.5	3	3	2	0.788
	lateral hypothalamus	71.5	64	51.5	69	0.846		raphe magnus	1	9	3.5	5	0.792
	substantia innominata	0.5	0	0	0	0.869		ventral pallidum	15.5	21	14.5	33	0.802
	subiculum dorsal	24.5	21	22	26	0.902		CA3 hippocampus ventral	8	13	5.5	11	0.829
	ventral medial nucleus	8	2	10	9	0.906		medial amygdaloid nucleus	9	11	6.5	13	0.863
	extended amydala	0	1	1	0	0.937		magnocellular preoptic nucleus	0	2	0.5	0	0.863
	dentate gyrus ventral	13.5	10	11.5	14	0.938		vestibular nucleus	41.5	16	24.5	20	0.864
	visual 1 ctx	16.5	25	30	9	0.944		triangular septal nucleus	0	0	0	0	0.883
	magnocellular preoptic nucleus	2	1	1.5	2	0.955		simple lobule cerebellum	63	51	86.5	25	0.908
	temporal ctx	2	1	3.5	3	0.957		paraventricular nucleus	0.5	0	0	0	0.916
	inferior colliculus	69.5	46	54.5	55	0.974		medial preoptic area	2.5	4	4	3	0.916
	substantia nigra compacta	3	1	2.5	1	0.98		anterior lobe pituitary	4.5	7	13.5	4	0.937
	dentate gyrus dorsal	44	44	51	35	0.988		solitary tract nucleus	9	18	9	7	0.965
