# Supplementary material for: Dose-dependent effects of GAT107, a novel allosteric agonist-positive allosteric modulator (ago-PAM) for the α7 nicotinic cholinergic receptor: a BOLD phMRI and connectivity study on awake rats
Source: Front Neurosci. 2023 Jun 23;17:1196786. doi: 10.3389/fnins.2023.1196786 (PMC10326388; doi:10.3389/fnins.2023.1196786)
Supplement: Supplementary file 2 [file Table_2.XLSX]

## Sheet: Sheet1
	Positive BOLD Volume of Activation							Negative BOLD Volume of Activation
		Veh		3 mg/kg					Veh		3 mg/kg
	Brain Area	Med		Med	P-val	Ω Sq		Brain Area	Med		Med	P-val	Ω Sq
	primary somatosensory ctx shoulder	0	<	14	0.01301	0.49499		insular ctx	237	>	80.5	0.00395	0.65495
	primary somatosensory ctx trunk	0	<	17	0.0132	0.49253		lateral orbital ctx	52	>	13.5	0.01027	0.50767
	primary somatosensory ctx jaw	21.5	<	159.5	0.01557	0.46341		reticular nucleus	11.5	>	0	0.01413	0.44809
	accumbens shell	14.5	<	32.5	0.02002	0.41967		anterior olfactory nucleus	96	>	26	0.01631	0.41009
	precuniform nucleus	0	<	1	0.02092	0.4121		rostral piriform ctx	104.5	>	12.5	0.01631	0.42951	FDR
	median raphe nucleus	0	<	11	0.02103	0.41125		external plexiform layer	56.5	>	23	0.02002	0.38521	p=0.015
	ectorhinal ctx	7	>	0	0.02223	0.40169		ventral orbital ctx	15.5	>	0.5	0.02397	0.38781
	ventral posteriolateral thalamic nucleus	3	<	26.5	0.02397	0.38883		2nd cerebellar lobule	8.5	<	54	0.03035	0.30484
	ventral orbital ctx	1.5	<	36	0.02749	0.36559		parafascicular thalamic nucleus	5	>	0	0.03057	0.33956
	accumbens core	1	<	24.5	0.02777	0.03199		7th cerebellar lobule	2	<	13	0.03506	0.35713
	primary somatosensory ctx hindlimb	0.5	<	66.5	0.02777	0.36387		endopiriform nucleus	29	>	8.5	0.03704	0.3125
	ventral anterior thalamic nucleus	0	<	9.5	0.02964	0.35291		granular cell layer	107.5	>	26	0.0442	0.26968
	secondary motor ctx	15	<	117.5	0.03006	0.04896		dorsal medial striatum	46.5	>	1.5	0.04458	0.28988
	ventral medial striatum	0	<	56	0.03089	0.34597		dentate gyrus dorsal	14.5		27.5	0.05424	0.21946
	premammillary nucleus	0	<	4	0.03216	0.02096		glomerular layer	75		40.5	0.05466	0.23133
	ventrolateral thalamic nucleus	0	<	14.5	0.03263	0.3368		ventral anterior thalamic nucleus	1.5		0	0.05854	0.21592
	anterior thalamic nuclei	3	<	36	0.03605	0.32025		primary somatosensory ctx shoulder	4		0	0.05957	0.267
	dorsal medial striatum	3.5	<	123	0.03605	0.32025		9th cerebellar lobule	15.5		53	0.06461	0.22182
	parafascicular thalamic nucleus	4	<	41.5	0.03605	0.32025		ectorhinal ctx	15.5		27.5	0.06461	0.26329
	primary somatosensory ctx barrel field	27	<	156	0.03605	0.32025		primary somatosensory ctx forelimb	27		3	0.06461	0.23671
	primary somatosensory ctx forelimb	6.5	<	123	0.03605	0.32025		ventral posteriolateral thalamic nucleus	7		0	0.06572	0.23647
	lateral orbital ctx	11	<	58.5	0.03704	0.31576		lemniscal nucleus	0		10.5	0.07416	0.1569
	reticular nucleus midbrain	27.5	<	81.5	0.03704	0.02173		copula of the pyramis	10.5		43	0.07765	0.17868
	insular ctx	42	<	203	0.03737	0.31429		perirhinal ctx	66.5		34.5	0.07765	0.19681
	primary motor ctx	34	<	275	0.03737	0.31429		primary somatosensory ctx jaw	70		6.5	0.07765	0.22625
	posterior thalamic nucleus	7.5	<	45.5	0.03737	0.31429		4th cerebellar lobule	8.5		32	0.07817	0.17584
	white matter	110	<	261	0.03737	0.03736		anterior thalamic nuclei	5.5		0	0.08069	0.20064
	dorsal lateral striatum	5	<	123.5	0.0416	0.29669	FDR	ventrolateral thalamic nucleus	3.5		0	0.08677	0.1964
	pontine reticular nucleus oral	3	<	44	0.04308	0.00307	p=0.039	dentate gyrus ventral	2.5		15.5	0.09155	0.14437
	parietal ctx	3	<	32.5	0.04345	0.03925		secondary somaotsensory ctx	39		14	0.09213	0.16044
	endopiriform nucleus	2	<	26	0.04458	0.28539		red nucleus	4		0	0.10497	0.13162
	anterior cingulate ctx	18.5	<	116	0.04495	0.05947		dorsal lateral striatum	49.5		10	0.10745	0.16484
	lateral septal nucleus	21.5	<	89	0.04495	0.28403		3rd cerebellar lobule	11		32.5	0.10807	0.13015
	reticular nucleus	3		20	0.05382	0.25495		frontal association ctx	13		3.5	0.10807	0.12851
	retrosplenial rostral ctx	8		55	0.05424	0.05744		paramedian lobule	19.5		78.5	0.10931	0.13276
	CA3 dorsal	13		58	0.05466	0.25246		primary somatosensory ctx upper lip	39		9	0.10931	0.152
	rostral piriform ctx	30.5		145.5	0.05466	0.25246		visual 2 ctx	24		91	0.10931	0.12124
	raphe magnus	0		1.5	0.05778	0.03974		primary somatosensory ctx hindlimb	17.5		7	0.12486	0.15084
	reticulotegmental nucleus	0		2	0.05778	0.06615		subiculum dorsal	11.5		18	0.12687	0.10263
	supraoptic nucleus	0.5		0	0.05778	1		primary motor ctx	49.5		16	0.12754	0.14168
	CA2	0		1	0.07165	0.00918		sub coeruleus nucleus	2.5		5.5	0.14453	0.08634
	motor trigeminal nucleus	2		4	0.07505	0.02258		median raphe nucleus	3.5		0	0.17064	0.11301
	primary somatosensory ctx upper lip	21.5		122.5	0.07609	0.20035		substantia nigra reticularis	4.5		12	0.17198	0.08133
	White Matter	23.5		43.5	0.07765	0.05326		8th cerebellar lobule	27		39	0.17273	0.09021
	infralimbic ctx	17		33.5	0.07817	0.00124		arcuate nucleus	1.5		0	0.1812	0.04222
	perirhinal ctx	16.5		48.5	0.07817	0.19617		facial nucleus	0.5		16.5	0.19142	0.04754
	retrochiasmatic nucleus	0		1	0.08284	0.02253		visual 1 ctx	43.5		81.5	0.1994	0.04641
	claustrum	0		7	0.08677	0.00574		PCRt	34		67	0.20018	0.0456
	ventral posteriolmedial thalamic nucleus	1.5		20.5	0.08698	0.17975		posterior thalamic nucleus	12.5		4.5	0.20018	0.08352
	external plexiform layer	33.5		52.5	0.10931	0.14527		lateral dorsal thalamic nucleus	1.5		0	0.21096	0.03367
	granular cell layer	72		129.5	0.10931	0.14527		pedunculopontine tegmental area	0		1	0.2144	0.03774
	ventral pallidum	16		29	0.10931	0.05807		medial septum	0.5		0	0.21554	0.02418
	central medial thalamic nucleus	0		5	0.11335	0.14299		lateral septal nucleus	23.5		3.5	0.22813	0.06428
	bed nucleus stria terminalis	0.5		12	0.12149	0.06578		raphe linear	4.5		0	0.2315	0.03856
	ventromedial thalamic nucleus	0.5		15	0.12149	0.12966		Lat	0.5		4	0.24424	0.03687
	medial dorsal thalamic nucleus	4		11	0.12352	0.04489		raphe obscurus nucleus	0		1.5	0.25177	0.03838
	CA1 dorsal	26.5		42.5	0.12687	0.07088		ventral posteriolmedial thalamic nucleus	6.5		1	0.253	0.04205
	lateral dorsal thalamic nucleus	0.5		4.5	0.13214	0.1174		accumbens shell	17		11.5	0.25897	0.06133
	anterior pretectal nucleus	0.5		12	0.13361	0.11579		10th cerebellar lobule	10.5		25	0.25982	0.01517
	7th cerebellar lobule	0		0	0.13801	0.11111		root of trigeminal nerve	27		43	0.2615	0.01464
	anterior amygdaloid nucleus	0		0	0.13801	0.04303		6th cerebellar lobule	50.5		95	0.26233	0.01616
	locus ceruleus	0		0	0.13801	0.0265		gigantocellular reticular nucleus pons	59.5		103.5	0.26233	0.01373
	lateral posterior thalamic nucleus	19		35.5	0.14883	0.07667		primary somatosensory ctx trunk	1.5		0	0.2656	0.06543
	anterior olfactory nucleus	17		62.5	0.14954	0.09961		tenia tecta ctx	14		6	0.29369	0.01322
	prelimbic ctx	14		58.5	0.14954	0.07914		precuniform nucleus	0		0.5	0.29466	0.04697
	substantia nigra reticularis	21.5		14.5	0.16895	0.0824		CA3 dorsal	31		7.5	0.29626	0.03025
	raphe linear	0		4.5	0.18242	0.07176		temporal ctx	44		34	0.29711	0.00133
	medial septum	0.5		2.5	0.18736	0.06809		anterior pretectal nucleus	4		0	0.30413	0.01107
	secondary somaotsensory ctx	22		62.5	0.19702	0.06123		reticulotegmental nucleus	0		0	0.31731	-0.06615
	ventral lateral striatum	1.5		58.5	0.19702	0.06123		subthalamic nucleus	0		0	0.31731	0
	tenia tecta ctx	18		30.5	0.19861	0.06015		ventromedial thalamic nucleus	20		3	0.31823	0.00843
	glomerular layer	66.5		113	0.1994	0.05961		periolivary nucleus	3		6	0.33241	-0.01337
	pontine reticular nucleus caudal	6.5		19.5	0.1994	0.02439		medial geniculate	2.5		15	0.33326	-0.00109
	auditory ctx	32		83.5	0.20018	0.0247		pontine nuclei	13		23	0.33326	-0.00179
	medial geniculate	18.5		9.5	0.20018	0.00109		inferior colliculus	62.5		83.5	0.33667	-0.01274
	caudal piriform ctx	87.5		114.5	0.20018	0.0247		principal sensory nucleus trigeminal	29.5		42	0.33667	-0.01274
	dorsal raphe	2		0	0.21133	0.04908		retrosplenial caudal ctx	105		120.5	0.33667	-0.0054
	pedunculopontine tegmental area	0		1	0.21232	0.05116		primary somatosensory ctx barrel field	20.5		15.5	0.33667	0.02333
	pontine nuclei	19.5		12	0.22731	0.00179		ventral lateral striatum	76.5		59.5	0.33667	0.00022
	red nucleus	0		1	0.22776	0.04185		supramammillary nucleus	0		3	0.36776	-0.04046
	flocculus cerebellum	2.5		10.5	0.22813	0.07796		infralimbic ctx	7.5		0.5	0.36998	-0.00124
	CA3 hippocampus ventral	9		16	0.2615	0.07944		parabrachial nucleus	7		11	0.37427	-0.02519
	copula of the pyramis	22		7	0.2615	0.02396		dorsal raphe	0		0	0.39908	-0.04908
	olfactory tubercles	43		66	0.2615	0.07893		extended amydala	5		2.5	0.40287	-0.02507
	basal amygdaloid nucleus	21		41	0.26233	0.04741		claustrum	3		1.5	0.41165	-0.00574
	paramedian lobule	24.5		13.5	0.26233	0.02355		ventral medial striatum	15.5		8.5	0.41506	0.00458
	dorsomedial tegmental area	0		5.5	0.2656	0.05776		pontine reticular nucleus oral	4		2	0.41924	-0.00307
	8th cerebellar lobule	11		0	0.284	0.01357		auditory ctx	137.5		77	0.42334	-0.0247
	9th cerebellar lobule	12		0	0.284	0.01357		crus 2 of ansiform lobule	14		30	0.42334	-0.03317
	DPGi	0		2.5	0.29466	0.05769		periaqueductal gray thalamus	39.5		30.5	0.42334	-0.03281
	lateral geniculate	9		15	0.29626	0.06559		caudal piriform ctx	74.5		64.5	0.42334	-0.0247
	zona incerta	11.5		17.5	0.29626	0.04881		pontine reticular nucleus caudal	11.5		22.5	0.42334	-0.02439
	retrosplenial caudal ctx	67		45	0.29711	0.0054		CA2	1.5		0.5	0.43996	-0.00918
	arcuate nucleus	0		4.5	0.30987	0.00287		medial orbital ctx	0.5		3	0.44088	-0.04788
	subthalamic nucleus	0		0	0.31731	0		neural lobe pituitary	0.5		2.5	0.44088	-0.05011
	crus 1 of ansiform lobule	62.5		38	0.33412	0.0638		interpeduncular nucleus	0		3	0.45325	-0.04557
	lateral preoptic area	3.5		10.5	0.33497	0.08669		substantia nigra compacta	0.5		4	0.45325	-0.04716
	globus pallidus	0		2	0.35657	0.07997		motor trigeminal nucleus	0.5		2	0.45411	-0.02258
	3rd cerebellar lobule	2		14.5	0.37596	0.01978		intercalated amygdaloid nucleus	0		0	0.4606	-0.0599
	medial preoptic area	6.5		13	0.3768	0.07895		retrochiasmatic nucleus	0.5		0	0.46521	-0.02253
	CA1 hippocampus ventral	19		24	0.37764	0.05957		substantia innominata	0.5		0	0.46521	-0.04558
	medial cerebellar nucleus fastigial	0		0	0.4005	0.03237		premammillary nucleus	1		0	0.47119	-0.02096
	prerubral field	0.5		2	0.40466	0.07643		medial dorsal thalamic nucleus	1		0	0.47315	-0.04489
	4th cerebellar lobule	2		6.5	0.41422	0.03047		trapezoid body	1		3.5	0.51054	-0.04697
	lemniscal nucleus	19.5		13	0.41924	0.03177		medial mammillary nucleus	2.5		3.5	0.51132	-0.05431
	2nd cerebellar lobule	13.5		8	0.42007	0.03198		zona incerta	21.5		10	0.51741	-0.04881
	vestibular nucleus	6.5		25.5	0.42007	0.06591		basal amygdaloid nucleus	23.5		19.5	0.52038	-0.04741
	frontal association ctx	10.5		24	0.42171	0.0324		central gray	4.5		6	0.52038	-0.05676
	periaqueductal gray thalamus	38.5		64.5	0.42334	0.03281		paraflocculus cerebellum	66.5		121	0.52111	-0.05397
	superior colliculus	45.5		77	0.42334	0.05198		reticular nucleus midbrain	56.5		55	0.52111	-0.02173
	ventral tegmental area	2		7	0.45411	0.0813		entorhinal ctx	101.5		136.5	0.52184	-0.05665
	1st cerebellar lobule	0		0	0.4606	0.02542		simple lobule cerebellum	63		86.5	0.52184	-0.05605
	raphe obscurus nucleus	0		0	0.4606	0.0416		superior colliculus	63.5		45	0.52184	-0.05198
	solitary tract nucleus	12.5		4.5	0.46646	0.0807		paraventricular nucleus	0.5		0	0.5311	-0.07459
	interpeduncular nucleus	4.5		6.5	0.46725	0.04557		pineal gland	3		2.5	0.54565	0.0332
	medial orbital ctx	9.5		4	0.46725	0.04788		1st cerebellar lobule	6.5		5	0.57111	-0.02542
	ventral subiculum	33		25.5	0.46725	0.06656		CA1 hippocampus ventral	18.5		13	0.57179	-0.05957
	crus 2 of ansiform lobule	13		36	0.46961	0.03317		dorsomedial tegmental area	1		0.5	0.61301	-0.05776
	interposed nucleus	0		0.5	0.47411	0.06737		lateral geniculate	5		3	0.62294	-0.06559
	reuniens nucleus	0		10.5	0.50579	0.0914		posterior hypothalamic area	9.5		12	0.62608	-0.06895
	posterior hypothalamic area	4.5		10	0.51816	0.06895		medial cerebellar nucleus fastigial	4.5		5.5	0.6267	-0.03237
	anterior lobe pituitary	33		23.5	0.52111	0.07693		accumbens core	7		5	0.62732	-0.03199
	dentate gyrus dorsal	44		51	0.52111	0.05366		parietal ctx	5.5		3.5	0.62732	-0.03925
	medial amygdaloid nucleus	11.5		17.5	0.52111	0.06927		medial amygdaloid nucleus	9		6.5	0.62854	-0.06927
	lateral hypothalamus	71.5		51.5	0.52184	0.08782		vestibular nucleus	41.5		24.5	0.63036	-0.06591
	paraflocculus cerebellum	84		53.5	0.52184	0.05397		ventral subiculum	24		26.5	0.63036	-0.06656
	substantia innominata	0.5		0	0.52747	0.04558		crus 1 of ansiform lobule	91		98	0.63095	-0.0638
	Lat	0.5		0	0.5311	0.05543		White Matter	262.5		218.5	0.63095	-0.03736
	paraventricular nucleus	3.5		8.5	0.57179	0.07459		paraventricular nuclus	0		0.5	0.6546	-0.08106
	medial mammillary nucleus	5		7	0.62421	0.05431		anterior lobe pituitary	4.5		13.5	0.68309	-0.07693
	supramammillary nucleus	2		4	0.62421	0.04046		inferior olivary complex	6		8.5	0.68418	-0.07915
	neural lobe pituitary	2.5		5	0.62732	0.05011		cochlear nucleus	7.5		8	0.68631	-0.07698
	inferior colliculus	69.5		54.5	0.63095	0.01274		ventral pallidum	15.5		14.5	0.68788	-0.05807
	principal sensory nucleus trigeminal	22.5		32	0.63095	0.01274		White Matter	19		16	0.6884	-0.05326
	triangular septal nucleus	1		2	0.67634	0.11358		diagonal band of Broca	0.5		0	0.72042	-0.09887
	lateral amygdaloid nucleus	3		4	0.68578	0.08398		locus ceruleus	1		1	0.73297	-0.0265
	central amygdaloid nucleus	3		2.5	0.68631	0.08914		prerubral field	2		1	0.73888	-0.07643
	5th cerebellar lobule	9.5		25	0.6884	0.08729		bed nucleus stria terminalis	3		6.5	0.73983	-0.06578
	root of trigeminal nerve	32.5		35	0.6884	0.07639		habenula nucleus	1		1.5	0.74352	-0.08474
	diagonal band of Broca	6		6.5	0.6884	0.09887		medial preoptic area	2.5		4	0.74352	-0.07895
	extended amydala	0		1	0.72718	0.02507		prelimbic ctx	1		7	0.79765	-0.07914
	paraventricular nuclus	0		2	0.73194	0.08106		DPGi	2		3.5	0.8051	-0.05769
	subiculum dorsal	24.5		22	0.74792	0.08159		interposed nucleus	6.5		11.5	0.8082	-0.06737
	periolivary nucleus	8.5		8.5	0.74792	0.01337		lateral amygdaloid nucleus	4.5		5.5	0.8092	-0.08398
	PCRt	36		29	0.74877	0.08165		retrosplenial rostral ctx	9.5		10.5	0.80953	-0.05744
	trapezoid body	0.5		0.5	0.79605	0.04697		secondary motor ctx	25.5		15.5	0.80985	-0.04896
	magnocellular preoptic nucleus	2		1.5	0.80718	0.10715		solitary tract nucleus	9		9	0.80985	-0.0807
	temporal ctx	2		3.5	0.80786	0.08557		anterior amygdaloid nucleus	0		0	0.84739	-0.04303
	10th cerebellar lobule	6		2.5	0.80853	0.08561		ventral tegmental area	2.5		4	0.87052	-0.0813
	parabrachial nucleus	6.5		7	0.80853	0.02519		flocculus cerebellum	9.5		6	0.87211	-0.07796
	cochlear nucleus	10		8.5	0.80853	0.07698		CA1 dorsal	36		50	0.87234	-0.07088
	facial nucleus	8.5		12	0.80953	0.08567		CA3 hippocampus ventral	8		5.5	0.87234	-0.07944
	cortical amygdaloid nucleus	32		37	0.80953	0.09111		5th cerebellar lobule	43		68.5	0.87278	-0.08729
	gigantocellular reticular nucleus pons	36		27.5	0.80985	0.08569		olfactory tubercles	24		17.5	0.87278	-0.07893
	substantia nigra compacta	3		2.5	0.86981	0.04716		central medial thalamic nucleus	0		0	0.90203	-0.14299
	sub coeruleus nucleus	3		2	0.87052	0.08851		magnocellular preoptic nucleus	0		0.5	0.92855	-0.10715
	visual 1 ctx	16.5		30	0.87189	0.08856		reuniens nucleus	1		3.5	0.93189	-0.0914
	inferior olivary complex	3.5		5.5	0.87234	0.07915		raphe magnus	1		3.5	0.93359	-0.03974
	anterior hypothalamic area	9.5		10	0.87256	0.09047		lateral preoptic area	1		3	0.93457	-0.08669
	visual 2 ctx	27.5		33.5	0.87278	0.0886		globus pallidus	5		4.5	0.93493	-0.07997
	ventral medial nucleus	8		10	0.93562	0.09549		lateral posterior thalamic nucleus	3.5		3	0.93504	-0.07667
	habenula nucleus	9.5		12	0.93585	0.08474		cortical amygdaloid nucleus	6		7.5	0.93551	-0.09111
	simple lobule cerebellum	10		9.5	0.93585	0.05605		central amygdaloid nucleus	10.5		10.5	0.93562	-0.08914
	entorhinal ctx	129.5		149.5	0.93607	0.05665		anterior hypothalamic area	6.5		12.5	0.93596	-0.09047
	6th cerebellar lobule	5.5		20	1	0.09091		anterior cingulate area	23.5		25.5	1	-0.05947
	central gray	9		12.5	1	0.05676		lateral hypothalamus	32		69.5	1	-0.08782
	dentate gyrus ventral	13.5		11.5	1	0.09091		triangular septal nucleus	0		0	1	-0.11358
	intercalated amygdaloid nucleus	0		0	1	0.0599		ventral medial nucleus	4.5		3	1	-0.09549
	pineal gland	0		0	NaN	NaN		supraoptic nucleus	0		0	NaN	-1
